# Supplementary material
Source: PubMed Central journal article supplement (PMC7905645)
Supplement: Supplementary_Data.pdf [file Supplementary_Data.pdf]

Figure S1. Compound C induces EGR-1 expression in skin cancer cells. (A) Compound C was involved in p53-EGR-1 pathway in BCC cells. Arrows were indicated as TP53 and EGR-1. (B) For the time-dependent assay, C32 and A375 cells were treated with 40  $\mu\text{M}$  compound C for 0, 1, 2, 4, 6, 8, 12 or 24 h. For the dose-dependent assay, C32 cells were treated with 0, 1, 5, 10, 20, or 40  $\mu\text{M}$  compound C for 8 h. A375 cells were treated with 0, 1, 5, 10, 20 or 40  $\mu\text{M}$  compound C for 6 h. Protein expression level of EGR-1 was detected by immunoblotting. (C) HaCaT and C32 cells were treated with 0 or 40  $\mu\text{M}$  compound C for 6 or 8 h. Immunofluorescence staining images were captured by confocal microscopy. Scale bar, 20  $\mu\text{m}$ . EGR-1, early growth response 1; BCC, basal cell carcinoma; cDNA, complimentary DNA.

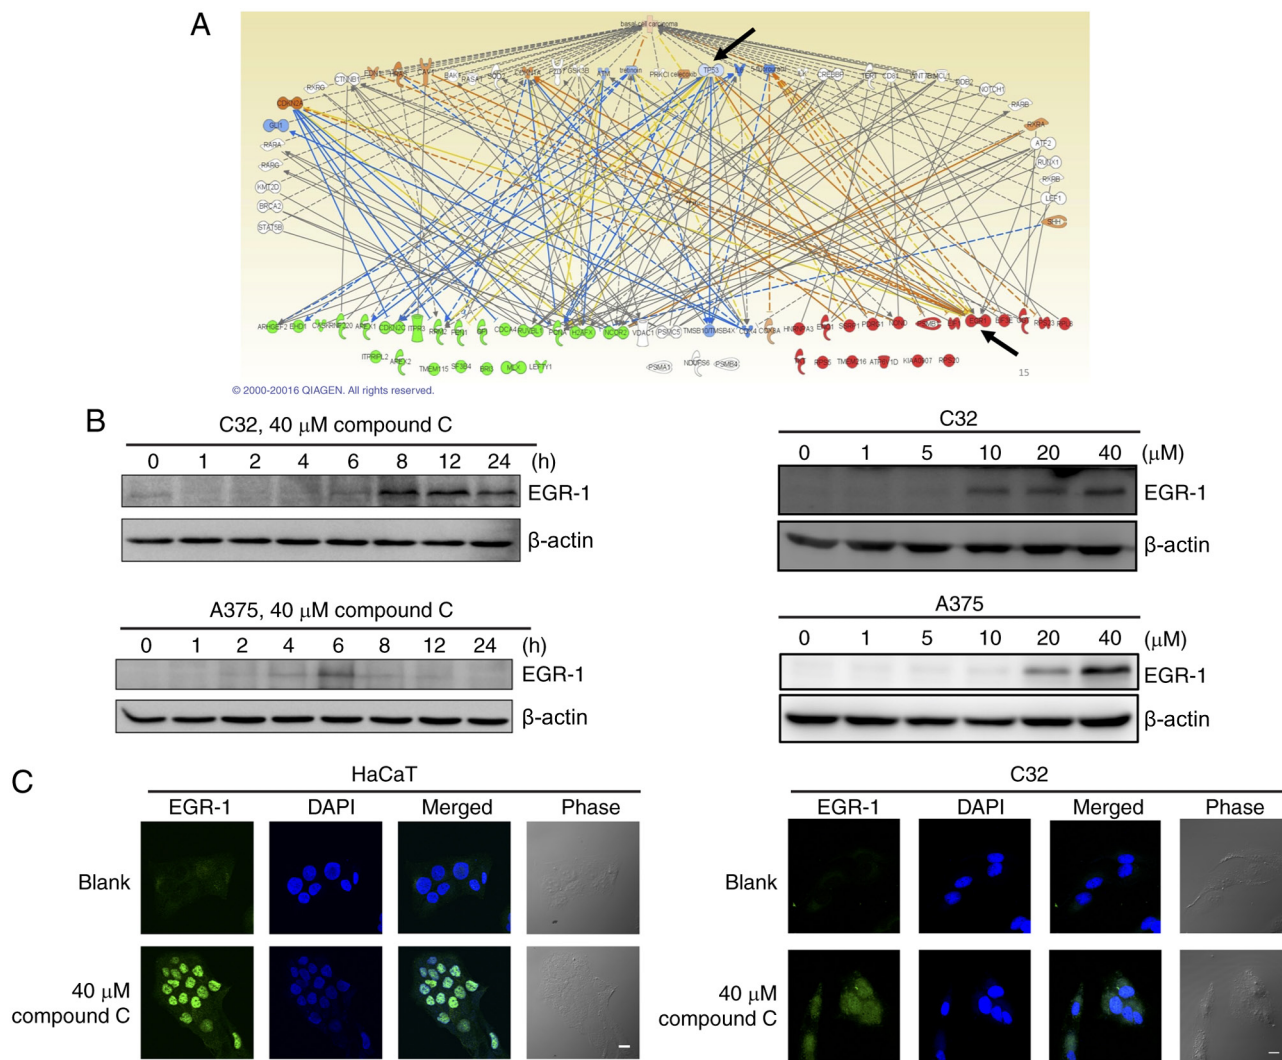

Figure S2. AMPK activation was not involved in compound C-induced EGR-1 expression in C32 and A375 cells. C32 and A375 cells were co-treated with or without 4 mM metformin and 40  $\mu$ M compound C for 8 or 6 h. Expression levels of EGR-1, AMPK, p-AMPK and  $\beta$ -actin were detected by immunoblotting.

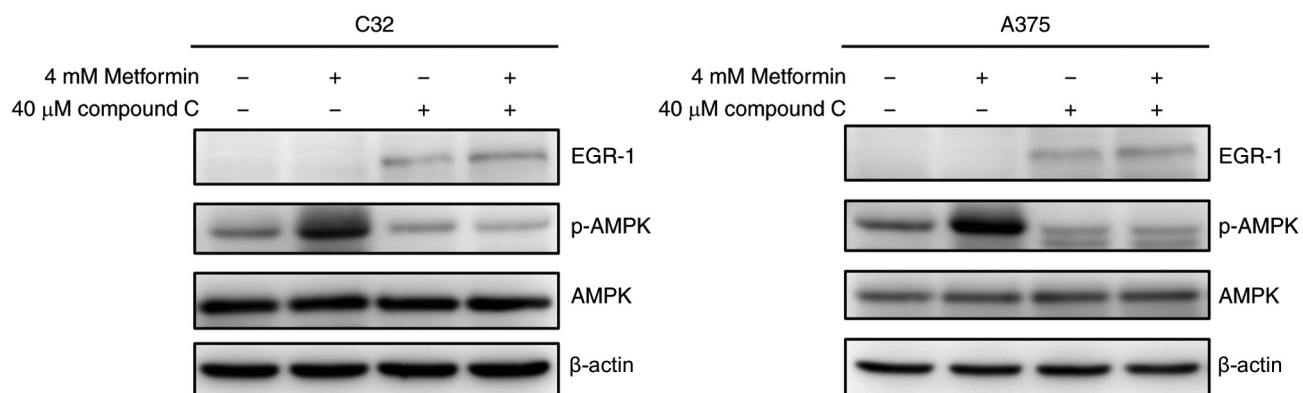

Figure S3. Compound C upregulates the EGR-1 expression mediated by the ERK signaling pathway. (A) C32 and A375 cells were treated with 40  $\mu$ M compound C for 8 or 6 h. (B) C32 cells were pretreated with 10  $\mu$ M U0126 for 1 h and then treated with 40  $\mu$ M compound C for 8 h. (C and D) C32 cells were pretreated with 2 mM NAC for 1 h and then treated with 40  $\mu$ M compound C for 4 or 8 h to evaluate the ROS or protein expression levels. Expression levels of EGR-1. This statistical result was analyzed using one-way ANOVA. \*\*\*P<0.001 vs. control. p-ERK, ERK and  $\beta$ -actin were detected by immunoblotting. EGR-1, early growth response 1; NAC, N-acetyl-cysteine; p-, phosphorylated.

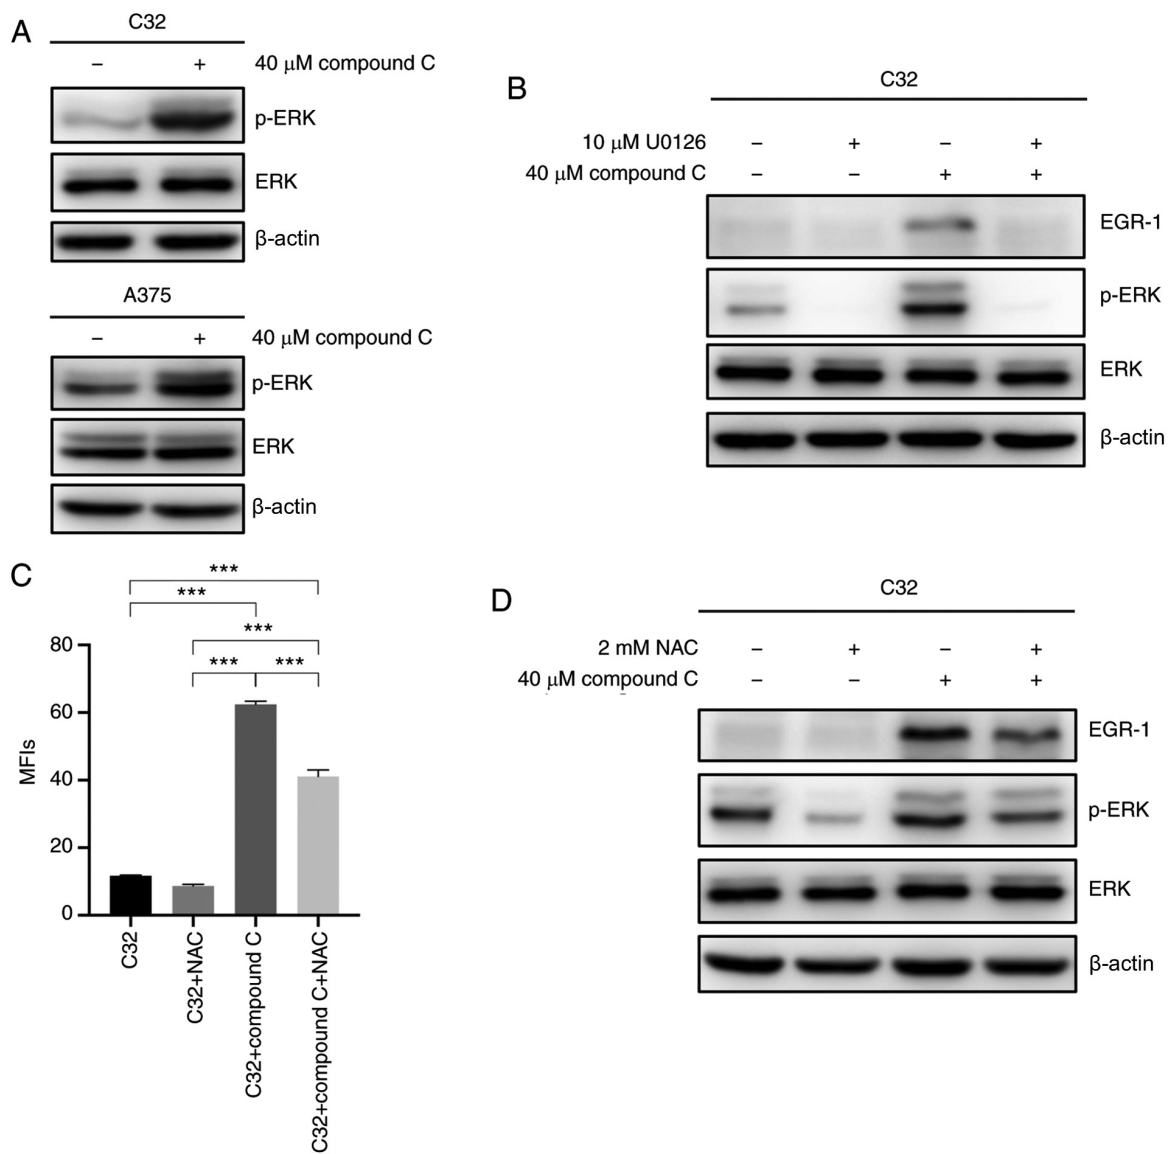

Figure S4. Compound C-induced p53 expression is EGR-1-independent. Control and EGR-1-knockdown BCC cells were treated with 40  $\mu$ M compound C for 6 h. Expression levels of EGR-1, p53 and  $\beta$ -actin were detected by immunoblotting. EGR-1, early growth response 1; BCC, basal cell carcinoma.

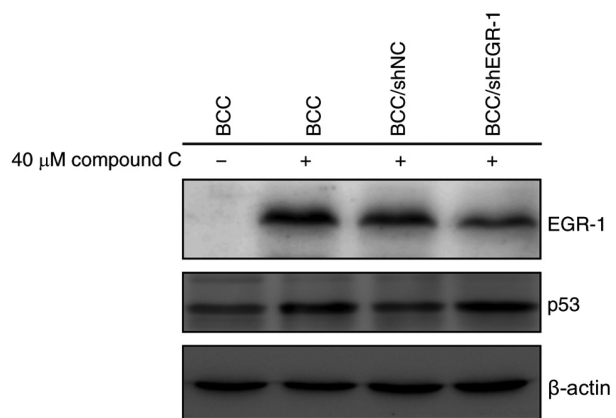

Table SI. The top-five genes were significantly upregulated by CC.

| Gene          | CC/Con [ $\log_2$ (Ratio)] | P-value                |
|---------------|----------------------------|------------------------|
| FOS           | 4.11                       | $3.04 \times 10^{-11}$ |
| EGR-1         | 3.93                       | $1.02 \times 10^{-15}$ |
| BAAT          | 3.89                       | $1.26 \times 10^{-23}$ |
| GDF15, PGPEP1 | 3.73                       | $6.03 \times 10^{-17}$ |
| INSIG1        | 3.34                       | $2.99 \times 10^{-13}$ |

CC, compound C; Con, control.
